# Supplementary material
Source: publisher figshare collection journal article supplement (https://acs.figshare.com/ndownloader/files/4204540)
Supplement: Supplementary file 1 [file 4204540]

## Supporting Information

### Hydrogen Storage Properties of the $3\text{Mg}(\text{NH}_2)_2-2\text{Li}_3\text{AlH}_6$ System

Jun Yang,<sup>\*</sup> Dongan Liu<sup>+</sup>, Andrea Sudik, Chris Wolverton,<sup>§</sup>Patrick Ferro<sup>\$</sup>

<sup>+</sup> Department of Mechanical Engineering, University of Michigan, 1023 H. H. Dow Building, 2350 Hayward Street, Ann Arbor, MI 48109, USA

<sup>§</sup>Department of Materials Science and Engineering, Northwestern University, 2220 Campus Drive, Evanston, IL 60208, USA

<sup>\$</sup>Department of Mechanical Engineering, Gonzaga University, 502 East Boone Avenue, Spokane, WA 99258, USA

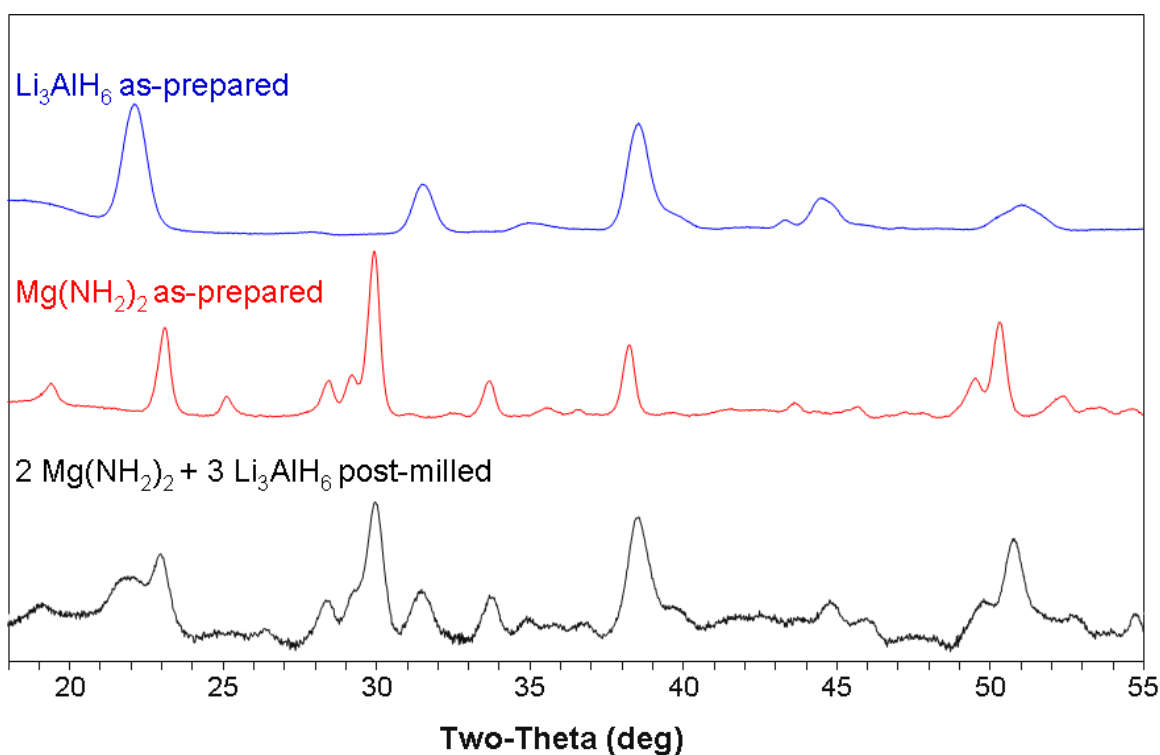

**Figure S1.** Room temperature PXRD patterns for post-milled  $3\text{Mg}(\text{NH}_2)_2-2\text{Li}_3\text{AlH}_6$  (black) as compared to PXRD patterns for as-prepared  $\text{Mg}(\text{NH}_2)_2$  (red) and  $\text{Li}_3\text{AlH}_6$  (blue).

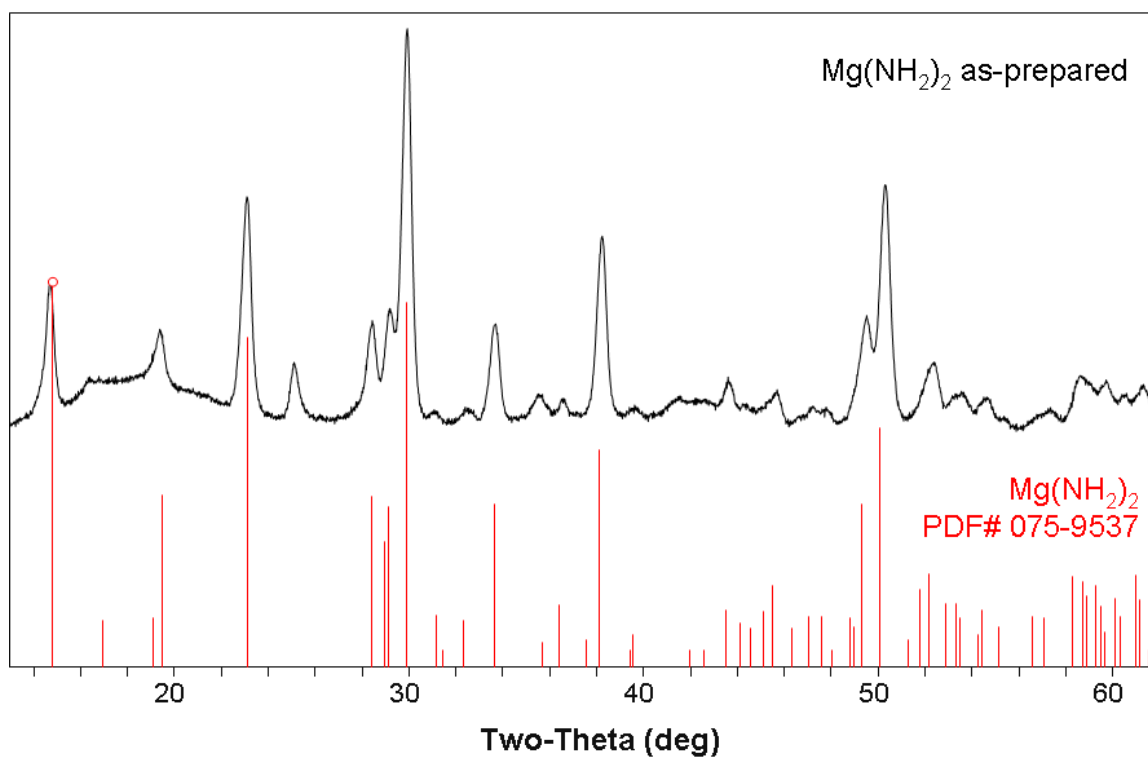

**Figure S2.** Room temperature PXRD patterns for as-prepared  $\text{Mg}(\text{NH}_2)_2$  (black). Phase assignment is made based on comparisons with PDF data for  $\text{Mg}(\text{NH}_2)_2$  (#075-9537).

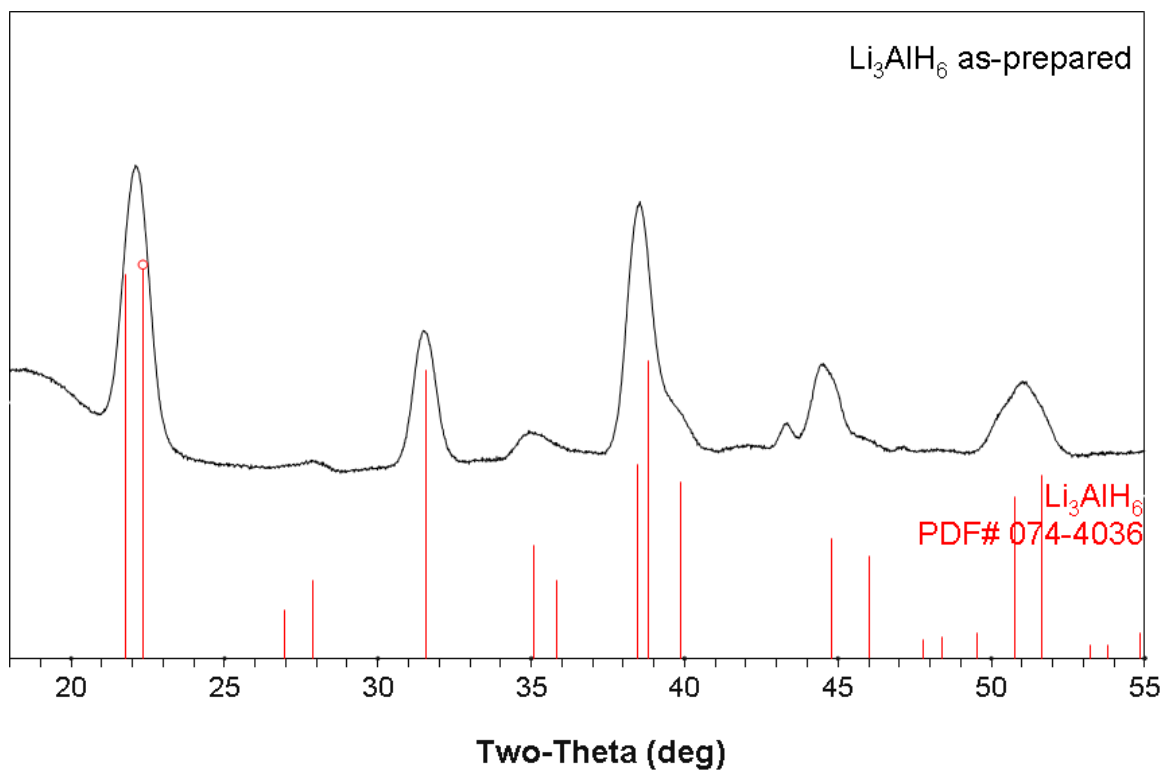

**Figure S3.** Room temperature PXRD patterns for as-prepared  $\text{Li}_3\text{AlH}_6$  (black). Phase assignment is made based on comparisons with PDF data for  $\text{Li}_3\text{AlH}_6$  (#074-4036).

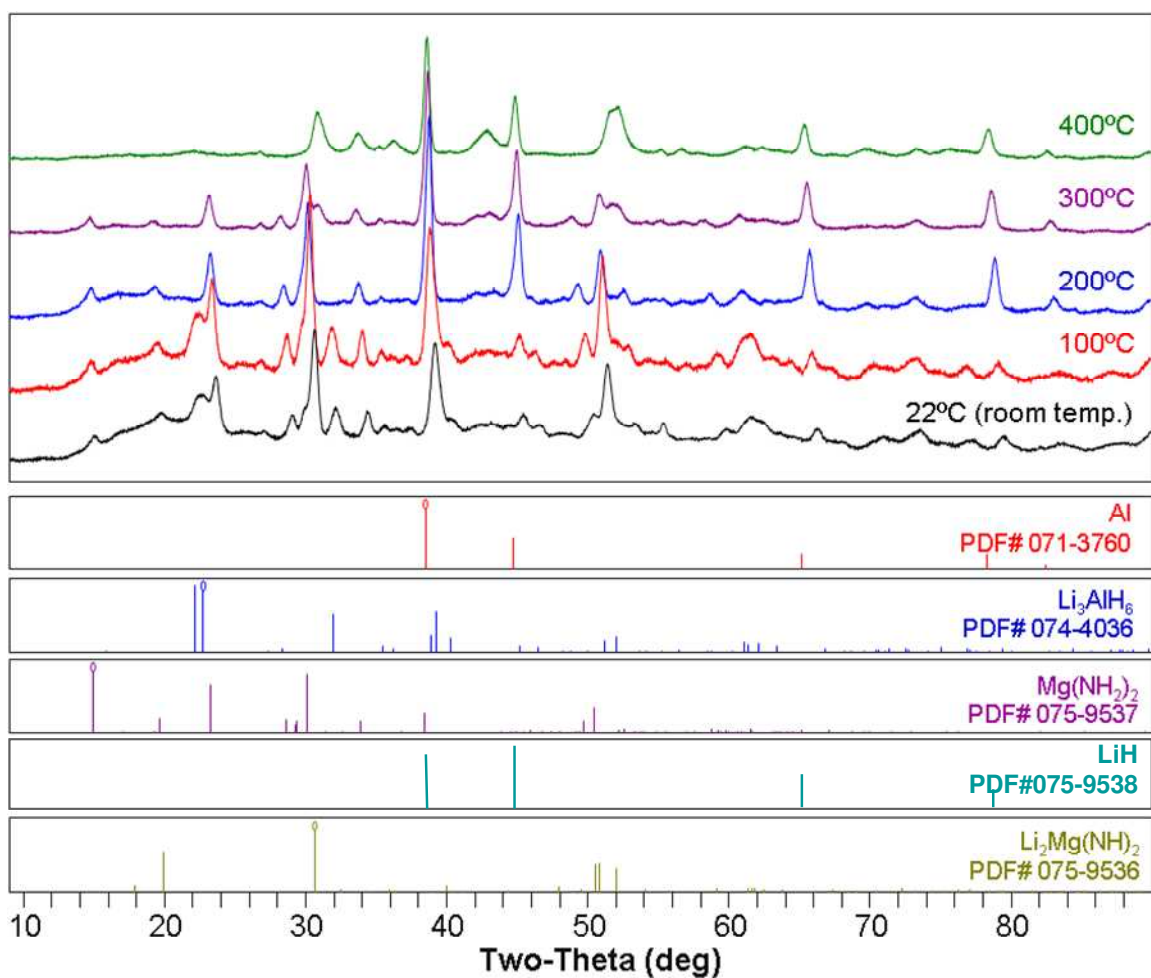

**Figure S4.** Select in-situ PXRD data for  $3\text{Mg}(\text{NH}_2)_2 \cdot 2\text{Li}_3\text{AlH}_6$  as a function of temperature at 22°C (black), 100°C (red), 200°C (blue), 300°C (purple), and 400°C (green). Phase assignments were made based on comparisons with PDF data for Al (#071-3760, red),  $\text{Li}_3\text{AlH}_6$  (#074-4036, blue),  $\text{Mg}(\text{NH}_2)_2$  (#075-9537, purple), LiH (#075-9538, light blue) and  $\text{Li}_2\text{Mg}(\text{NH}_2)_2$  (#075-9536, green).

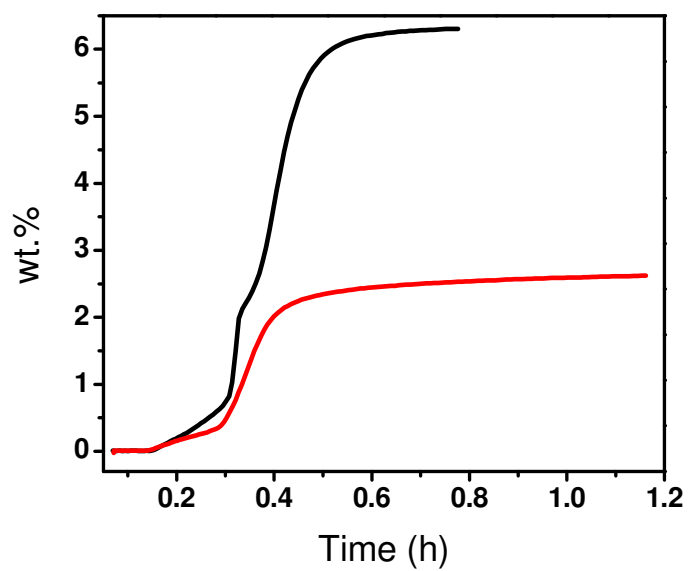

**Figure S5.** Hydrogen desorption kinetics at 300°C to 1 bar H<sub>2</sub> back-pressure for 3Mg(NH<sub>2</sub>)<sub>2</sub>-2Li<sub>3</sub>AlH<sub>6</sub> mixed at low-energy for the first (black) and second (red) desorption cycles after recharging at 230°C and 180 bar H<sub>2</sub> for 10 hours.
